# Supplementary material for: Evolutionary analysis of the OSCA gene family in sunflower (Helianthus annuus L) and expression analysis under NaCl stress
Source: PeerJ. 2023 Apr 17;11:e15089. doi: 10.7717/peerj.15089 (PMC10117387; doi:10.7717/peerj.15089)
Supplement: Data S1 [file peerj-11-15089-s006.xls]

## Sheet: Sheet1
qRT-PCR raw data
gene_name	Time	Ct-1	Ct-2	Ct-3				average	P-value
Actin-2	0h	18.3	18.44	18.51
	1h	20.11	20.25	20.53
	3h	19.77	20.04	20.15
	6h	19.97	20.05	20.6
	12h	19.5	19.66	19.7
	24h	19.37	19.42	19.34
HaOSCA1.1	0h	33.42	33.61	33.53	1	1	1	1
	1h	34.97	35.2	35.33	1.19748	1.16473	1.16473	1.17565	0.0789054
	3h	34.76	34.99	34.93	1.09429	1.16473	1.18099	1.14667	0.146085
	6h	34.77	35.01	35.19	2.49666	2.31338	2.69447	2.5015	0.0015915
	12h	32.24	32.46	32.11	5.20537	5.16941	5.81589	5.39689	0.000101325
	24h	33.67	33.64	33.59	1.76541	1.93187	1.70527	1.80085	0.00873857
HaOSCA1.2	0h	30.85	30.87	30.95	1	1	1	1
	1h	31.64	31.46	31.66	2.02792	2.32947	2.47942	2.27893	0.000951021
	3h	31.53	31.23	31.79	1.72907	2.36199	1.7411	1.94405	0.0219894
	6h	30.04	29.87	30.23	5.57897	6.10504	7.01285	6.23229	0.000355639
	12h	31.8	31.79	31.6	1.18921	1.23114	1.45397	1.29144	0.142309
	24h	31.72	31.84	31.13	1.1487	1.00696	1.56917	1.24161	0.092395
HaOSCA1.4	0h	32.81	32.57	32.72	1	1	1	1
	1h	34.66	34.48	34.91	0.972655	0.933033	0.888843	0.93151	0.0819269
	3h	34.41	34.27	34.63	0.913831	0.933033	0.82932	0.892061	0.0551777
	6h	34.3	34.27	34.82	1.13288	0.939523	0.993092	1.02183	0.159833
	12h	33.96	33.96	33.8	1.03526	0.888843	1.07923	1.00111	0.149682
	24h	33.89	33.67	33.49	0.993092	0.920188	1.04247	0.985249	0.131515
HaOSCA1.5	0h	33.3	33.32	33.19	1	1	1	1
	1h	34.97	34.76	34.91	1.10191	1.29235	1.23114	1.20847	0.0972279
	3h	34.26	34.25	34.24	1.42405	1.59107	1.50525	1.50679	0.0335221
	6h	33.16	33.29	33.46	3.50642	3.11666	3.53081	3.38463	0.00739137
	12h	32.41	32.33	32.42	4.25748	4.62675	3.89062	4.25828	0.00206713
	24h	34.09	33.97	33.89	1.21419	1.25701	1.09429	1.1885	0.0943479
HaOSCA1.6	0h	21.67	21.99	21.99	1	1	1	1
	1h	23.52	23.89	23.93	0.972655	0.939523	1.05702	0.989732	0.0605805
	3h	23.36	23.64	23.87	0.858565	0.965936	0.846745	0.890416	0.0656693
	6h	24.04	24.55	24.67	0.615572	0.517632	0.664343	0.599183	0.000715828
	12h	24.44	24.55	24.75	0.336808	0.395021	0.336808	0.356212	0.000608865
	24h	23.32	23.37	23.42	0.668964	0.757858	0.659754	0.695525	0.00417797
HaOSCA1.7	0h	33.77	33.67	33.65	1	1	1	1
	1h	35.51	35.36	35.4	1.04972	1.08673	1.20581	1.11409	0.091561
	3h	34.98	35.09	34.92	1.19748	1.13288	1.29235	1.20757	0.0872122
	6h	34.96	34.87	35.11	1.39474	1.32869	1.54756	1.42366	0.102267
	12h	34.5	34.66	34.54	1.38511	1.17283	1.23114	1.26303	0.10067
	24h	34.56	34.4	34.23	1.21419	1.18921	1.18921	1.19754	0.0741267
HaOSCA2.2	0h	32.66	32.56	32.5	1	1	1	1
	1h	33.93	33.99	34.36	1.45397	1.30134	1.11729	1.29087	0.168587
	3h	33.21	33.3	33.1	1.89212	1.81504	2.05623	1.92113	0.00318416
	6h	32.4	32.09	32.54	3.81055	4.22807	4.14106	4.05989	0.00127619
	12h	33.32	33.19	33.3	1.45397	1.50525	1.31039	1.4232	0.110005
	24h	33.5	33.66	33.35	1.17283	0.920188	0.986233	1.02642	0.13103
HaOSCA2.5	0h	25.36	25.3	25.17	1	1	1	1
	1h	27.13	27.33	27.33	1.02811	0.858565	0.907519	0.931399	0.0922603
	3h	26.53	26.49	26.59	1.23114	1.32869	1.16473	1.24152	0.0834672
	6h	26.89	26.64	26.94	1.10191	1.20581	1.24833	1.18535	0.0723264
	12h	26.66	26.51	26.48	0.933033	1.00696	0.920188	0.953392	0.0818299
	24h	26.16	26.19	25.79	1.20581	1.06437	1.15669	1.14229	0.0828099
HaOSCA2.6	0h	32.75	32.79	32.79	1	1	1	1
	1h	33.65	33.54	33.88	1.87905	2.08493	1.90528	1.95642	0.00606635
	3h	31.63	31.73	31.67	6.02099	6.32033	6.77396	6.37176	0.00111314
	6h	30.84	30.98	31.23	11.9588	10.7034	12.5533	11.7385	0.000442904
	12h	32.82	32.55	32.83	2.18859	2.75108	2.21914	2.38627	0.00330696
	24h	33.31	33.45	33.35	1.42405	1.24833	1.20581	1.29273	0.0956974
HaOSCA3.1	0h	30.04	29.87	29.97	1	1	1	1
	1h	29.96	30.02	29.92	3.70635	3.16017	4.19887	3.68846	0.00158181
	3h	28.84	28.59	28.63	6.36429	7.3615	7.88986	7.20522	0.00069933
	6h	27.57	27.47	27.78	17.6305	16.1113	19.4271	17.723	0.000480748
	12h	27.87	27.76	27.46	10.3388	10.0561	12.996	11.1303	0.000928878
	24h	29.61	29.64	29.96	2.82843	2.31338	1.79005	2.31062	0.029194
