# Supplementary material for: Evolutionary analysis of the OSCA gene family in sunflower (Helianthus annuus L) and expression analysis under NaCl stress
Source: PeerJ. 2023 Apr 17;11:e15089. doi: 10.7717/peerj.15089 (PMC10117387; doi:10.7717/peerj.15089)
Supplement: Table S1 [file peerj-11-15089-s002.xls]

## Sheet: Sheet1
Table S1. All primers used in this study
gene_name	F	R
HaActin	TGGAATGGAAGCTGCTGGTA	TTGATCTTCATGCTGCTCGG
HaOSCA1.1	AGGCCAGGGAAGATCTGAAG	GGACTTGCCCTTAAACCCCT
HaOSCA1.2	ATGCCGGATGCGCTAAAGAT	TCGAGCCAATTGTTCGTCCA
HaOSCA1.4	TGGTAGATGGATGGGCTGGA	CAGCTGGATTTGCGGTTCAC
HaOSCA1.5	TCTTGAATTGGGTGCCTGCT	GAAACGGGTGGGTCAAGACA
HaOSCA1.6	CCACCAGAAGTACGAGAGCG	CAGGTGTTGAGTTTGCTGCC
HaOSCA1.7	GTCCAACAAGAAAGACGGGC	GGCTGACATTATGCGTTTCGG
HaOSCA2.2	AACTGCTCTGTCCAGGATGC	CATTGTGACACGCGCTTGAG
HaOSCA2.6	TAGCCAGTGTCCGTAGACCA	TCGCATGAATACCACCGCAT
HaOSCA3.1	TCAAAGAAAACGGCAAGCGG	GGGTTTAGCTTCGGGTGACA
