# Supplementary material for: Evolutionary analysis of the OSCA gene family in sunflower (Helianthus annuus L) and expression analysis under NaCl stress
Source: PeerJ. 2023 Apr 17;11:e15089. doi: 10.7717/peerj.15089 (PMC10117387; doi:10.7717/peerj.15089)
Supplement: Table S2 [file peerj-11-15089-s003.xls]

## Sheet: Sheet1
Table S2. Ka/Ks ratios of repeated OSCA gene pairs in sunflower
Sequence	Ka	Ks	Ka/Ks	P-Value(Fisher)
HaOSCA1.5&HaOSCA1.6	0.0859595	0.543507	0.158157	5.41605e-76
HaOSCA2.2&HaOSCA2.1	0.121582	0.524226	0.231927	1.24336e-48
HaOSCA1.2&HaOSCA1.1	0.0626005	0.645724	0.0969463	3.01771e-102
HaOSCA1.8&HaOSCA1.7	0.162478	1.27191	0.127743	4.20995e-190
HaOSCA1.3&HaOSCA1.1	0.977364	1.08859	0.897823	0.000886149
