# Supplementary material for: Evolutionary analysis of the OSCA gene family in sunflower (Helianthus annuus L) and expression analysis under NaCl stress
Source: PeerJ. 2023 Apr 17;11:e15089. doi: 10.7717/peerj.15089 (PMC10117387; doi:10.7717/peerj.15089)
Supplement: Table S3 [file peerj-11-15089-s004.xls]

## Sheet: Sheet1
Table S3. cis-acting elements analysis of OSCA family members in sunflower.
gene_name	Site Name	function
HaOSCA1.1	ABRE	ABA−responsiveness cis−acting element
HaOSCA1.1	TGA-element	auxin−responsiveness cis−acting element
HaOSCA1.1	TC-rich repeats	defense and stress responsiveness cis−acting element
HaOSCA1.1	TATC-box	GA−responsiveness cis−acting element
HaOSCA1.1	GARE-motif	GA−responsiveness cis−acting element
HaOSCA1.1	GARE-motif	GA−responsiveness cis−acting element
HaOSCA1.1	GARE-motif	GA−responsiveness cis−acting element
HaOSCA1.1	GARE-motif	GA−responsiveness cis−acting element
HaOSCA1.1	P-box	GA−responsiveness cis−acting element
HaOSCA1.2	ABRE	ABA−responsiveness cis−acting element
HaOSCA1.2	ABRE	ABA−responsiveness cis−acting element
HaOSCA1.2	ABRE	ABA−responsiveness cis−acting element
HaOSCA1.2	LTR	low-temperature−responsiveness cis−acting element
HaOSCA1.2	TCA-element	SA−responsiveness cis−acting element
HaOSCA1.3	ABRE	ABA−responsiveness cis−acting element
HaOSCA1.3	ABRE	ABA−responsiveness cis−acting element
HaOSCA1.3	ABRE	ABA−responsiveness cis−acting element
HaOSCA1.3	ABRE	ABA−responsiveness cis−acting element
HaOSCA1.3	ABRE	ABA−responsiveness cis−acting element
HaOSCA1.3	ABRE	ABA−responsiveness cis−acting element
HaOSCA1.3	TGA-element	auxin−responsiveness cis−acting element
HaOSCA1.3	P-box	GA−responsiveness cis−acting element
HaOSCA1.3	MRE	MYB binding site
HaOSCA1.4	ABRE	ABA−responsiveness cis−acting element
HaOSCA1.4	ABRE	ABA−responsiveness cis−acting element
HaOSCA1.4	TGACG-motif	MeJA−responsiveness cis−acting element
HaOSCA1.4	TGACG-motif	MeJA−responsiveness cis−acting element
HaOSCA1.4	TGACG-motif	MeJA−responsiveness cis−acting element
HaOSCA1.4	CGTCA-motif	MeJA−responsiveness cis−acting element
HaOSCA1.4	CGTCA-motif	MeJA−responsiveness cis−acting element
HaOSCA1.4	CGTCA-motif	MeJA−responsiveness cis−acting element
HaOSCA1.4	TCA-element	SA−responsiveness cis−acting element
HaOSCA1.5	ABRE	ABA−responsiveness cis−acting element
HaOSCA1.5	ABRE	ABA−responsiveness cis−acting element
HaOSCA1.5	ABRE	ABA−responsiveness cis−acting element
HaOSCA1.5	TGACG-motif	MeJA−responsiveness cis−acting element
HaOSCA1.5	TGACG-motif	MeJA−responsiveness cis−acting element
HaOSCA1.5	CGTCA-motif	MeJA−responsiveness cis−acting element
HaOSCA1.5	CGTCA-motif	MeJA−responsiveness cis−acting element
HaOSCA1.5	MBS	MYB binding site
HaOSCA1.5	MBS	MYB binding site
HaOSCA1.5	TCA-element	SA−responsiveness cis−acting element
HaOSCA1.6	TGA-element	auxin−responsiveness cis−acting element
HaOSCA1.6	TGACG-motif	MeJA−responsiveness cis−acting element
HaOSCA1.6	TGACG-motif	MeJA−responsiveness cis−acting element
HaOSCA1.6	CGTCA-motif	MeJA−responsiveness cis−acting element
HaOSCA1.6	CGTCA-motif	MeJA−responsiveness cis−acting element
HaOSCA1.6	MBS	MYB binding site
HaOSCA1.6	MRE	MYB binding site
HaOSCA1.6	CCAAT-box	MYB binding site
HaOSCA1.7	ABRE	ABA−responsiveness cis−acting element
HaOSCA1.7	ABRE	ABA−responsiveness cis−acting element
HaOSCA1.7	ABRE	ABA−responsiveness cis−acting element
HaOSCA1.7	ABRE	ABA−responsiveness cis−acting element
HaOSCA1.7	ABRE	ABA−responsiveness cis−acting element
HaOSCA1.7	ABRE	ABA−responsiveness cis−acting element
HaOSCA1.7	TC-rich repeats	defense and stress responsiveness cis−acting element
HaOSCA1.7	TGACG-motif	MeJA−responsiveness cis−acting element
HaOSCA1.7	CGTCA-motif	MeJA−responsiveness cis−acting element
HaOSCA1.7	MBSI	MYB binding site
HaOSCA1.7	MRE	MYB binding site
HaOSCA2.1	ABRE	ABA−responsiveness cis−acting element
HaOSCA2.1	ABRE	ABA−responsiveness cis−acting element
HaOSCA2.1	ABRE	ABA−responsiveness cis−acting element
HaOSCA2.1	MBS	MYB binding site
HaOSCA2.1	MBS	MYB binding site
HaOSCA2.1	MBS	MYB binding site
HaOSCA2.1	MRE	MYB binding site
HaOSCA2.1	TCA-element	SA−responsiveness cis−acting element
HaOSCA2.2	ABRE	ABA−responsiveness cis−acting element
HaOSCA2.2	ABRE	ABA−responsiveness cis−acting element
HaOSCA2.2	ABRE	ABA−responsiveness cis−acting element
HaOSCA2.2	ABRE	ABA−responsiveness cis−acting element
HaOSCA2.2	ABRE	ABA−responsiveness cis−acting element
HaOSCA2.2	ABRE	ABA−responsiveness cis−acting element
HaOSCA2.2	TGA-element	auxin−responsiveness cis−acting element
HaOSCA2.2	TGA-box	auxin−responsiveness cis−acting element
HaOSCA2.2	TC-rich repeats	defense and stress responsiveness cis−acting element
HaOSCA2.2	TC-rich repeats	defense and stress responsiveness cis−acting element
HaOSCA2.2	LTR	low-temperature−responsiveness cis−acting element
HaOSCA2.2	LTR	low-temperature−responsiveness cis−acting element
HaOSCA2.2	TGACG-motif	MeJA−responsiveness cis−acting element
HaOSCA2.2	TGACG-motif	MeJA−responsiveness cis−acting element
HaOSCA2.2	TGACG-motif	MeJA−responsiveness cis−acting element
HaOSCA2.2	CGTCA-motif	MeJA−responsiveness cis−acting element
HaOSCA2.2	CGTCA-motif	MeJA−responsiveness cis−acting element
HaOSCA2.2	CGTCA-motif	MeJA−responsiveness cis−acting element
HaOSCA2.2	MBSI	MYB binding site
HaOSCA2.2	CCAAT-box	MYB binding site
HaOSCA2.3	ABRE	ABA−responsiveness cis−acting element
HaOSCA2.3	TATC-box	GA−responsiveness cis−acting element
HaOSCA2.3	GARE-motif	GA−responsiveness cis−acting element
HaOSCA2.3	P-box	GA−responsiveness cis−acting element
HaOSCA2.3	P-box	GA−responsiveness cis−acting element
HaOSCA2.3	LTR	low-temperature−responsiveness cis−acting element
HaOSCA2.3	LTR	low-temperature−responsiveness cis−acting element
HaOSCA2.3	TGACG-motif	MeJA−responsiveness cis−acting element
HaOSCA2.3	CGTCA-motif	MeJA−responsiveness cis−acting element
HaOSCA2.3	CCAAT-box	MYB binding site
HaOSCA2.4	ABRE	ABA−responsiveness cis−acting element
HaOSCA2.4	ABRE	ABA−responsiveness cis−acting element
HaOSCA2.4	ABRE	ABA−responsiveness cis−acting element
HaOSCA2.4	ABRE	ABA−responsiveness cis−acting element
HaOSCA2.4	ABRE	ABA−responsiveness cis−acting element
HaOSCA2.4	ABRE	ABA−responsiveness cis−acting element
HaOSCA2.4	ABRE	ABA−responsiveness cis−acting element
HaOSCA2.4	ABRE	ABA−responsiveness cis−acting element
HaOSCA2.4	ABRE	ABA−responsiveness cis−acting element
HaOSCA2.4	ABRE	ABA−responsiveness cis−acting element
HaOSCA2.4	ABRE	ABA−responsiveness cis−acting element
HaOSCA2.4	TGA-element	auxin−responsiveness cis−acting element
HaOSCA2.4	TGA-element	auxin−responsiveness cis−acting element
HaOSCA2.4	P-box	GA−responsiveness cis−acting element
HaOSCA2.4	LTR	low-temperature−responsiveness cis−acting element
HaOSCA2.4	TGACG-motif	MeJA−responsiveness cis−acting element
HaOSCA2.4	TGACG-motif	MeJA−responsiveness cis−acting element
HaOSCA2.4	TGACG-motif	MeJA−responsiveness cis−acting element
HaOSCA2.4	CGTCA-motif	MeJA−responsiveness cis−acting element
HaOSCA2.4	CGTCA-motif	MeJA−responsiveness cis−acting element
HaOSCA2.4	CGTCA-motif	MeJA−responsiveness cis−acting element
HaOSCA2.4	CCAAT-box	MYB binding site
HaOSCA2.4	CCAAT-box	MYB binding site
HaOSCA2.5	ABRE	ABA−responsiveness cis−acting element
HaOSCA2.5	ABRE	ABA−responsiveness cis−acting element
HaOSCA2.5	ABRE	ABA−responsiveness cis−acting element
HaOSCA2.5	ABRE	ABA−responsiveness cis−acting element
HaOSCA2.5	TC-rich repeats	defense and stress responsiveness cis−acting element
HaOSCA2.6	ABRE	ABA−responsiveness cis−acting element
HaOSCA2.6	ABRE	ABA−responsiveness cis−acting element
HaOSCA2.6	ABRE	ABA−responsiveness cis−acting element
HaOSCA2.6	ABRE	ABA−responsiveness cis−acting element
HaOSCA2.6	AuxRR-core	auxin−responsiveness cis−acting element
HaOSCA2.6	P-box	GA−responsiveness cis−acting element
HaOSCA2.6	LTR	low-temperature−responsiveness cis−acting element
HaOSCA2.6	CGTCA-motif	MeJA−responsiveness cis−acting element
HaOSCA2.6	CGTCA-motif	MeJA−responsiveness cis−acting element
HaOSCA2.6	TGACG-motif	MeJA−responsiveness cis−acting element
HaOSCA2.6	TGACG-motif	MeJA−responsiveness cis−acting element
HaOSCA3.1	ABRE	ABA−responsiveness cis−acting element
HaOSCA3.1	ABRE	ABA−responsiveness cis−acting element
HaOSCA3.1	ABRE	ABA−responsiveness cis−acting element
HaOSCA3.1	ABRE	ABA−responsiveness cis−acting element
HaOSCA3.1	ABRE	ABA−responsiveness cis−acting element
HaOSCA3.1	AuxRR-core	auxin−responsiveness cis−acting element
HaOSCA3.1	TGA-element	auxin−responsiveness cis−acting element
HaOSCA3.1	LTR	low-temperature−responsiveness cis−acting element
HaOSCA3.1	LTR	low-temperature−responsiveness cis−acting element
HaOSCA3.1	LTR	low-temperature−responsiveness cis−acting element
HaOSCA3.1	TGACG-motif	MeJA−responsiveness cis−acting element
HaOSCA3.1	CGTCA-motif	MeJA−responsiveness cis−acting element
HaOSCA3.1	TCA-element	SA−responsiveness cis−acting element
