# Supplementary material for: Evolutionary analysis of the OSCA gene family in sunflower (Helianthus annuus L) and expression analysis under NaCl stress
Source: PeerJ. 2023 Apr 17;11:e15089. doi: 10.7717/peerj.15089 (PMC10117387; doi:10.7717/peerj.15089)
Supplement: Table S4 [file peerj-11-15089-s005.xls]

## Sheet: Sheet1
Table S4. Co-expression network genes of sunflower under NaCl treatment.
gene_id	gene_name	weight
HannXRQ_Chr01g0015911	HaOSCA1.1	0.716348
HannXRQ_Chr01g0018901	HaOSCA1.1	0.711677
HannXRQ_Chr01g0010261	HaOSCA1.1	0.708763
HannXRQ_Chr01g0007561	HaOSCA1.1	0.705704
HannXRQ_Chr01g0008131	HaOSCA1.1	0.704494
HannXRQ_Chr01g0005541	HaOSCA1.1	0.703328
HannXRQ_Chr01g0016591	HaOSCA1.1	0.702362
HannXRQ_Chr01g0003941	HaOSCA1.1	0.701649
HannXRQ_Chr01g0020731	HaOSCA1.1	0.697173
HannXRQ_Chr01g0010081	HaOSCA1.1	0.696674
HannXRQ_Chr01g0000841	HaOSCA1.1	0.695862
HannXRQ_Chr01g0001311	HaOSCA1.1	0.68981
HannXRQ_Chr01g0002161	HaOSCA1.1	0.687821
HannXRQ_Chr01g0006591	HaOSCA1.1	0.684954
HannXRQ_Chr01g0006381	HaOSCA1.1	0.683026
HannXRQ_Chr01g0017041	HaOSCA1.1	0.682564
HannXRQ_Chr01g0014221	HaOSCA1.1	0.678693
HannXRQ_Chr01g0008191	HaOSCA1.1	0.678186
HannXRQ_Chr01g0000431	HaOSCA1.1	0.677298
HannXRQ_Chr01g0002531	HaOSCA1.1	0.677007
HannXRQ_Chr01g0014191	HaOSCA1.1	0.675778
HannXRQ_Chr01g0001591	HaOSCA1.1	0.674364
HannXRQ_Chr01g0016471	HaOSCA1.1	0.670992
HannXRQ_Chr01g0003611	HaOSCA1.1	0.670449
HannXRQ_Chr01g0021311	HaOSCA1.1	0.669994
HannXRQ_Chr01g0000201	HaOSCA1.1	0.669935
HannXRQ_Chr01g0007691	HaOSCA1.1	0.66849
HannXRQ_Chr01g0021831	HaOSCA1.1	0.668208
HannXRQ_Chr01g0021351	HaOSCA1.1	0.667087
HannXRQ_Chr01g0009211	HaOSCA1.1	0.666322
HannXRQ_Chr01g0018011	HaOSCA1.1	0.666081
HannXRQ_Chr01g0005281	HaOSCA1.1	0.665802
HannXRQ_Chr01g0014831	HaOSCA1.1	0.665155
HannXRQ_Chr01g0018981	HaOSCA1.1	0.664139
HannXRQ_Chr01g0012131	HaOSCA1.1	0.663985
HannXRQ_Chr01g0005471	HaOSCA1.1	0.662918
HannXRQ_Chr01g0015111	HaOSCA1.1	0.660273
HannXRQ_Chr01g0006731	HaOSCA1.1	0.66
HannXRQ_Chr01g0013241	HaOSCA1.1	0.659694
HannXRQ_Chr01g0014871	HaOSCA1.1	0.659627
HannXRQ_Chr01g0005821	HaOSCA1.1	0.65837
HannXRQ_Chr01g0002451	HaOSCA1.1	0.658204
HannXRQ_Chr01g0011581	HaOSCA1.1	0.657533
HannXRQ_Chr01g0003111	HaOSCA1.1	0.656809
HannXRQ_Chr01g0015931	HaOSCA1.1	0.656591
HannXRQ_Chr01g0000761	HaOSCA1.1	0.656389
HannXRQ_Chr01g0011401	HaOSCA1.1	0.65617
HannXRQ_Chr01g0007021	HaOSCA1.1	0.656148
HannXRQ_Chr01g0017811	HaOSCA1.1	0.656008
HannXRQ_Chr01g0019621	HaOSCA1.1	0.655224
HannXRQ_Chr01g0005981	HaOSCA1.1	0.653543
HannXRQ_Chr01g0015921	HaOSCA1.1	0.651654
HannXRQ_Chr01g0021711	HaOSCA1.1	0.651558
HannXRQ_Chr01g0003341	HaOSCA1.1	0.651246
HannXRQ_Chr01g0006941	HaOSCA1.1	0.649122
HannXRQ_Chr01g0003001	HaOSCA1.1	0.647096
HannXRQ_Chr01g0002881	HaOSCA1.1	0.646066
HannXRQ_Chr01g0004301	HaOSCA1.1	0.640078
HannXRQ_Chr01g0003931	HaOSCA1.1	0.638999
HannXRQ_Chr01g0005271	HaOSCA1.1	0.638413
HannXRQ_Chr01g0002851	HaOSCA1.1	0.635953
HannXRQ_Chr01g0011481	HaOSCA1.1	0.635854
HannXRQ_Chr01g0001231	HaOSCA1.1	0.635782
HannXRQ_Chr01g0021361	HaOSCA1.1	0.635731
HannXRQ_Chr09g0250051	HaOSCA1.2	0.591095
HannXRQ_Chr09g0267551	HaOSCA1.2	0.586479
HannXRQ_Chr09g0271221	HaOSCA1.2	0.582087
HannXRQ_Chr09g0261971	HaOSCA1.2	0.579609
HannXRQ_Chr04g0106661	HaOSCA1.2	0.57836
HannXRQ_Chr08g0226271	HaOSCA1.2	0.577272
HannXRQ_Chr15g0478161	HaOSCA1.2	0.575208
HannXRQ_Chr04g0106651	HaOSCA1.2	0.574105
HannXRQ_Chr10g0309151	HaOSCA1.2	0.573765
HannXRQ_Chr10g0297861	HaOSCA1.2	0.572725
HannXRQ_Chr15g0480661	HaOSCA1.2	0.570337
HannXRQ_Chr03g0090431	HaOSCA1.2	0.566677
HannXRQ_Chr02g0047911	HaOSCA1.2	0.565639
HannXRQ_Chr14g0428141	HaOSCA1.2	0.565629
HannXRQ_Chr16g0523701	HaOSCA1.2	0.565387
HannXRQ_Chr13g0412901	HaOSCA1.2	0.564131
HannXRQ_Chr13g0417551	HaOSCA1.2	0.562841
HannXRQ_Chr13g0393171	HaOSCA1.2	0.562797
HannXRQ_Chr13g0411971	HaOSCA1.2	0.562614
HannXRQ_Chr01g0009771	HaOSCA1.2	0.561448
HannXRQ_Chr14g0437791	HaOSCA1.2	0.561374
HannXRQ_Chr09g0274181	HaOSCA1.2	0.561269
HannXRQ_Chr10g0301571	HaOSCA1.2	0.559816
HannXRQ_Chr12g0360571	HaOSCA1.2	0.559238
HannXRQ_Chr03g0073471	HaOSCA1.2	0.55859
HannXRQ_Chr01g0011101	HaOSCA1.2	0.558029
HannXRQ_Chr16g0503511	HaOSCA1.2	0.557297
HannXRQ_Chr15g0464351	HaOSCA1.2	0.554669
HannXRQ_Chr07g0189521	HaOSCA1.2	0.554506
HannXRQ_Chr07g0202021	HaOSCA1.2	0.553305
HannXRQ_Chr16g0508761	HaOSCA1.2	0.552439
HannXRQ_Chr12g0373721	HaOSCA1.2	0.552366
HannXRQ_Chr17g0563461	HaOSCA1.2	0.552114
HannXRQ_Chr04g0099961	HaOSCA1.2	0.551722
HannXRQ_Chr10g0283891	HaOSCA1.2	0.549988
HannXRQ_Chr15g0490541	HaOSCA1.2	0.549727
HannXRQ_Chr01g0021711	HaOSCA1.5	0.69923
HannXRQ_Chr01g0001311	HaOSCA1.5	0.694843
HannXRQ_Chr01g0006591	HaOSCA1.5	0.689318
HannXRQ_Chr01g0015111	HaOSCA1.5	0.686675
HannXRQ_Chr01g0014221	HaOSCA1.5	0.684291
HannXRQ_Chr01g0002161	HaOSCA1.5	0.681404
HannXRQ_Chr01g0018901	HaOSCA1.5	0.675567
HannXRQ_Chr01g0020731	HaOSCA1.5	0.674705
HannXRQ_Chr01g0006381	HaOSCA1.5	0.671942
HannXRQ_Chr01g0005821	HaOSCA1.5	0.670864
HannXRQ_Chr01g0011481	HaOSCA1.5	0.670339
HannXRQ_Chr01g0005541	HaOSCA1.5	0.65935
HannXRQ_Chr01g0007691	HaOSCA1.5	0.658444
HannXRQ_Chr01g0009211	HaOSCA1.5	0.657521
HannXRQ_Chr01g0010261	HaOSCA1.5	0.6557
HannXRQ_Chr01g0015911	HaOSCA1.5	0.654456
HannXRQ_Chr01g0016591	HaOSCA1.5	0.654272
HannXRQ_Chr01g0002851	HaOSCA1.5	0.650147
HannXRQ_Chr01g0021611	HaOSCA1.5	0.648336
HannXRQ_Chr01g0003941	HaOSCA1.5	0.648157
HannXRQ_Chr01g0011401	HaOSCA1.5	0.648126
HannXRQ_Chr01g0003611	HaOSCA1.5	0.645759
HannXRQ_Chr01g0011581	HaOSCA1.5	0.645552
HannXRQ_Chr01g0015921	HaOSCA1.5	0.643713
HannXRQ_Chr01g0008191	HaOSCA1.5	0.639028
HannXRQ_Chr09g0276481	HaOSCA1.6	0.61162
HannXRQ_Chr14g0437471	HaOSCA1.6	0.61139
HannXRQ_Chr06g0179231	HaOSCA1.6	0.611225
HannXRQ_Chr09g0276831	HaOSCA1.6	0.608526
HannXRQ_Chr12g0378831	HaOSCA1.6	0.607966
HannXRQ_Chr09g0257601	HaOSCA1.6	0.607372
HannXRQ_Chr17g0569031	HaOSCA1.6	0.607297
HannXRQ_Chr01g0001721	HaOSCA1.6	0.606086
HannXRQ_Chr09g0266631	HaOSCA1.6	0.605517
HannXRQ_Chr04g0111011	HaOSCA1.6	0.605447
HannXRQ_Chr17g0558561	HaOSCA1.6	0.60544
HannXRQ_Chr03g0079661	HaOSCA1.6	0.605162
HannXRQ_Chr02g0045131	HaOSCA1.6	0.605033
HannXRQ_Chr06g0165991	HaOSCA1.6	0.604769
HannXRQ_Chr10g0281311	HaOSCA1.6	0.60435
HannXRQ_Chr17g0568051	HaOSCA1.6	0.604019
HannXRQ_Chr08g0225081	HaOSCA1.6	0.603862
HannXRQ_Chr02g0039561	HaOSCA1.6	0.603426
HannXRQ_Chr05g0153701	HaOSCA1.6	0.60284
HannXRQ_Chr09g0265751	HaOSCA1.6	0.602636
HannXRQ_Chr12g0356701	HaOSCA1.6	0.602521
HannXRQ_Chr05g0137601	HaOSCA1.6	0.602466
HannXRQ_Chr10g0282161	HaOSCA1.6	0.602352
HannXRQ_Chr10g0312831	HaOSCA1.6	0.60211
HannXRQ_Chr10g0300691	HaOSCA1.6	0.602095
HannXRQ_Chr15g0471451	HaOSCA1.6	0.601841
HannXRQ_Chr13g0392811	HaOSCA1.6	0.601777
HannXRQ_Chr09g0252091	HaOSCA1.6	0.601304
HannXRQ_Chr16g0511181	HaOSCA1.6	0.600892
HannXRQ_Chr15g0478871	HaOSCA1.6	0.600547
HannXRQ_Chr01g0007581	HaOSCA1.6	0.599952
HannXRQ_Chr09g0276471	HaOSCA1.6	0.599834
HannXRQ_Chr03g0062641	HaOSCA1.6	0.599693
HannXRQ_Chr02g0035461	HaOSCA2.2	0.688108
HannXRQ_Chr03g0088531	HaOSCA2.2	0.686599
HannXRQ_Chr02g0038211	HaOSCA2.2	0.6844
HannXRQ_Chr01g0011241	HaOSCA2.2	0.682412
HannXRQ_Chr03g0083221	HaOSCA2.2	0.681879
HannXRQ_Chr01g0014711	HaOSCA2.2	0.678612
HannXRQ_Chr01g0011251	HaOSCA2.2	0.676752
HannXRQ_Chr03g0083791	HaOSCA2.2	0.676175
HannXRQ_Chr02g0033761	HaOSCA2.2	0.674011
HannXRQ_Chr04g0104381	HaOSCA2.2	0.673151
HannXRQ_Chr01g0028271	HaOSCA2.2	0.669968
HannXRQ_Chr03g0088911	HaOSCA2.2	0.669363
HannXRQ_Chr01g0027951	HaOSCA2.2	0.668754
HannXRQ_Chr01g0022311	HaOSCA2.2	0.667846
HannXRQ_Chr02g0056101	HaOSCA2.2	0.665331
HannXRQ_Chr03g0084051	HaOSCA2.2	0.665251
HannXRQ_Chr03g0071191	HaOSCA2.2	0.66425
HannXRQ_Chr01g0005461	HaOSCA2.2	0.663916
HannXRQ_Chr01g0000331	HaOSCA2.2	0.661378
HannXRQ_Chr03g0077201	HaOSCA2.2	0.659338
HannXRQ_Chr01g0016891	HaOSCA2.2	0.659035
HannXRQ_Chr04g0094711	HaOSCA2.2	0.657553
HannXRQ_Chr03g0075321	HaOSCA2.2	0.656717
HannXRQ_Chr01g0005051	HaOSCA2.2	0.655383
HannXRQ_Chr03g0085251	HaOSCA2.2	0.654427
HannXRQ_Chr04g0094721	HaOSCA2.2	0.653286
HannXRQ_Chr01g0000291	HaOSCA2.2	0.651358
HannXRQ_Chr02g0052061	HaOSCA2.2	0.651292
HannXRQ_Chr03g0086761	HaOSCA2.2	0.650474
HannXRQ_Chr01g0009091	HaOSCA2.2	0.650035
HannXRQ_Chr02g0035071	HaOSCA2.2	0.649698
HannXRQ_Chr01g0014541	HaOSCA2.2	0.649066
HannXRQ_Chr02g0045481	HaOSCA2.2	0.647611
HannXRQ_Chr03g0071771	HaOSCA2.2	0.647424
HannXRQ_Chr04g0121761	HaOSCA2.2	0.646748
HannXRQ_Chr04g0105641	HaOSCA2.2	0.646235
HannXRQ_Chr03g0086761	HaOSCA2.6	0.691542
HannXRQ_Chr01g0002691	HaOSCA2.6	0.688337
HannXRQ_Chr02g0052061	HaOSCA2.6	0.688083
HannXRQ_Chr04g0095211	HaOSCA2.6	0.686641
HannXRQ_Chr04g0104881	HaOSCA2.6	0.685592
HannXRQ_Chr01g0026181	HaOSCA2.6	0.685438
HannXRQ_Chr04g0094711	HaOSCA2.6	0.684848
HannXRQ_Chr02g0041301	HaOSCA2.6	0.684548
HannXRQ_Chr01g0027951	HaOSCA2.6	0.68326
HannXRQ_Chr03g0084051	HaOSCA2.6	0.682756
HannXRQ_Chr01g0016891	HaOSCA2.6	0.682245
HannXRQ_Chr01g0017231	HaOSCA2.6	0.681209
HannXRQ_Chr01g0028681	HaOSCA2.6	0.680049
HannXRQ_Chr01g0014711	HaOSCA2.6	0.678415
HannXRQ_Chr02g0055151	HaOSCA2.6	0.678023
HannXRQ_Chr01g0000291	HaOSCA2.6	0.676503
HannXRQ_Chr02g0045721	HaOSCA2.6	0.674787
HannXRQ_Chr04g0104381	HaOSCA2.6	0.674128
HannXRQ_Chr02g0033761	HaOSCA2.6	0.673251
HannXRQ_Chr03g0083791	HaOSCA2.6	0.672542
HannXRQ_Chr01g0009091	HaOSCA2.6	0.671458
HannXRQ_Chr01g0028271	HaOSCA2.6	0.669927
HannXRQ_Chr02g0053471	HaOSCA2.6	0.669167
HannXRQ_Chr04g0114331	HaOSCA2.6	0.668588
HannXRQ_Chr02g0056101	HaOSCA2.6	0.668052
HannXRQ_Chr03g0067571	HaOSCA2.6	0.667981
HannXRQ_Chr04g0109791	HaOSCA2.6	0.667919
HannXRQ_Chr02g0045141	HaOSCA2.6	0.66778
HannXRQ_Chr04g0104511	HaOSCA2.6	0.667627
HannXRQ_Chr01g0011241	HaOSCA2.6	0.666838
HannXRQ_Chr03g0091801	HaOSCA2.6	0.665692
HannXRQ_Chr03g0070121	HaOSCA2.6	0.663745
HannXRQ_Chr04g0119381	HaOSCA2.6	0.663649
HannXRQ_Chr01g0022311	HaOSCA2.6	0.66341
HannXRQ_Chr03g0088661	HaOSCA2.6	0.662762
HannXRQ_Chr02g0032371	HaOSCA2.6	0.66184
HannXRQ_Chr04g0094401	HaOSCA2.6	0.661832
HannXRQ_Chr03g0063271	HaOSCA2.6	0.659909
HannXRQ_Chr04g0121041	HaOSCA2.6	0.658908
HannXRQ_Chr01g0002521	HaOSCA2.6	0.658275
HannXRQ_Chr03g0088251	HaOSCA2.6	0.658266
HannXRQ_Chr01g0011251	HaOSCA2.6	0.657937
HannXRQ_Chr01g0006341	HaOSCA2.6	0.656341
HannXRQ_Chr04g0094721	HaOSCA2.6	0.654564
HannXRQ_Chr03g0061481	HaOSCA2.6	0.654553
HannXRQ_Chr04g0095361	HaOSCA2.6	0.653672
HannXRQ_Chr03g0088911	HaOSCA2.6	0.653461
HannXRQ_Chr03g0079641	HaOSCA2.6	0.65346
HannXRQ_Chr03g0067611	HaOSCA2.6	0.653043
HannXRQ_Chr03g0071771	HaOSCA2.6	0.651615
HannXRQ_Chr04g0100931	HaOSCA2.6	0.651603
HannXRQ_Chr04g0113111	HaOSCA2.6	0.651475
HannXRQ_Chr02g0059361	HaOSCA2.6	0.651382
HannXRQ_Chr02g0035051	HaOSCA2.6	0.651108
HannXRQ_Chr02g0031681	HaOSCA2.6	0.650507
HannXRQ_Chr04g0109581	HaOSCA2.6	0.650185
HannXRQ_Chr02g0043391	HaOSCA2.6	0.650005
HannXRQ_Chr04g0124441	HaOSCA2.6	0.648051
HannXRQ_Chr04g0109901	HaOSCA2.6	0.647871
HannXRQ_Chr03g0085251	HaOSCA2.6	0.647208
HannXRQ_Chr03g0069531	HaOSCA2.6	0.646819
HannXRQ_Chr10g0309151	HaOSCA3.1	0.590102
HannXRQ_Chr09g0250051	HaOSCA3.1	0.588922
HannXRQ_Chr02g0047911	HaOSCA3.1	0.584674
HannXRQ_Chr16g0523701	HaOSCA3.1	0.583187
HannXRQ_Chr14g0437791	HaOSCA3.1	0.582621
HannXRQ_Chr09g0267551	HaOSCA3.1	0.58259
HannXRQ_Chr13g0417551	HaOSCA3.1	0.581029
HannXRQ_Chr09g0271221	HaOSCA3.1	0.579843
HannXRQ_Chr09g0274181	HaOSCA3.1	0.579584
HannXRQ_Chr09g0261971	HaOSCA3.1	0.577858
HannXRQ_Chr03g0073471	HaOSCA3.1	0.576977
HannXRQ_Chr16g0503511	HaOSCA3.1	0.576135
HannXRQ_Chr07g0189521	HaOSCA3.1	0.57509
HannXRQ_Chr15g0464351	HaOSCA3.1	0.574999
HannXRQ_Chr15g0478161	HaOSCA3.1	0.574801
HannXRQ_Chr01g0011101	HaOSCA3.1	0.574172
HannXRQ_Chr04g0106661	HaOSCA3.1	0.573724
HannXRQ_Chr04g0099961	HaOSCA3.1	0.573124
HannXRQ_Chr08g0226271	HaOSCA3.1	0.57217
HannXRQ_Chr10g0283891	HaOSCA3.1	0.570453
HannXRQ_Chr10g0297861	HaOSCA3.1	0.570112
HannXRQ_Chr16g0526021	HaOSCA3.1	0.570064
HannXRQ_Chr16g0499831	HaOSCA3.1	0.569475
HannXRQ_Chr10g0278641	HaOSCA3.1	0.568869
HannXRQ_Chr15g0480661	HaOSCA3.1	0.568758
HannXRQ_Chr14g0445091	HaOSCA3.1	0.568713
HannXRQ_Chr17g0563461	HaOSCA3.1	0.568679
HannXRQ_Chr07g0202021	HaOSCA3.1	0.568493
HannXRQ_Chr15g0490541	HaOSCA3.1	0.567818
HannXRQ_Chr04g0106651	HaOSCA3.1	0.567151
HannXRQ_Chr08g0225761	HaOSCA3.1	0.56708
HannXRQ_Chr08g0229171	HaOSCA3.1	0.566526
HannXRQ_Chr16g0511251	HaOSCA3.1	0.565623
HannXRQ_Chr13g0413121	HaOSCA3.1	0.565459
HannXRQ_Chr07g0202951	HaOSCA3.1	0.565449
HannXRQ_Chr03g0083361	HaOSCA3.1	0.565329
HannXRQ_Chr17g0534241	HaOSCA3.1	0.565309
HannXRQ_Chr07g0193771	HaOSCA3.1	0.565271
HannXRQ_Chr14g0428141	HaOSCA3.1	0.565245
HannXRQ_Chr06g0181281	HaOSCA3.1	0.565169
HannXRQ_Chr07g0202811	HaOSCA3.1	0.56369
HannXRQ_Chr02g0051531	HaOSCA3.1	0.562757
HannXRQ_Chr05g0148381	HaOSCA3.1	0.561939
HannXRQ_Chr13g0393171	HaOSCA3.1	0.561651
HannXRQ_Chr13g0419911	HaOSCA3.1	0.561647
HannXRQ_Chr17g0533311	HaOSCA3.1	0.561432
HannXRQ_Chr06g0172081	HaOSCA3.1	0.561297
HannXRQ_Chr05g0146781	HaOSCA3.1	0.561052
HannXRQ_Chr14g0447911	HaOSCA3.1	0.560156
HannXRQ_Chr15g0479051	HaOSCA3.1	0.559608
HannXRQ_Chr04g0124761	HaOSCA3.1	0.559407
HannXRQ_Chr17g0561461	HaOSCA3.1	0.558525
HannXRQ_Chr17g0567321	HaOSCA3.1	0.558349
HannXRQ_Chr04g0125911	HaOSCA3.1	0.558244
HannXRQ_Chr10g0291201	HaOSCA3.1	0.557917
HannXRQ_Chr16g0508701	HaOSCA3.1	0.557588
HannXRQ_Chr04g0115711	HaOSCA3.1	0.557573
HannXRQ_Chr08g0222491	HaOSCA3.1	0.55757
HannXRQ_Chr11g0325961	HaOSCA3.1	0.557353
HannXRQ_Chr12g0362911	HaOSCA3.1	0.557178
HannXRQ_Chr12g0354261	HaOSCA3.1	0.556846
HannXRQ_Chr13g0412901	HaOSCA3.1	0.556731
HannXRQ_Chr03g0090431	HaOSCA3.1	0.556368
HannXRQ_Chr14g0442901	HaOSCA3.1	0.556302
HannXRQ_Chr10g0285181	HaOSCA3.1	0.556142
HannXRQ_Chr10g0312771	HaOSCA3.1	0.555956
HannXRQ_Chr14g0459241	HaOSCA3.1	0.555526
HannXRQ_Chr02g0054171	HaOSCA3.1	0.555492
HannXRQ_Chr10g0278631	HaOSCA3.1	0.555039
HannXRQ_Chr06g0171681	HaOSCA3.1	0.554924
HannXRQ_Chr17g0533951	HaOSCA3.1	0.554815
HannXRQ_Chr03g0072171	HaOSCA3.1	0.554765
HannXRQ_Chr16g0511421	HaOSCA3.1	0.554702
HannXRQ_Chr10g0305371	HaOSCA3.1	0.554159
HannXRQ_Chr05g0134361	HaOSCA3.1	0.554042
HannXRQ_Chr13g0411971	HaOSCA3.1	0.553663
HannXRQ_Chr09g0271701	HaOSCA3.1	0.553639
HannXRQ_Chr12g0360571	HaOSCA3.1	0.553466
HannXRQ_Chr15g0465581	HaOSCA3.1	0.553117
HannXRQ_Chr06g0175771	HaOSCA3.1	0.553027
HannXRQ_Chr13g0417671	HaOSCA3.1	0.552667
HannXRQ_Chr10g0301571	HaOSCA3.1	0.552593
HannXRQ_Chr08g0221861	HaOSCA3.1	0.552391
HannXRQ_Chr02g0034981	HaOSCA3.1	0.552326
HannXRQ_Chr10g0302761	HaOSCA3.1	0.552168
HannXRQ_Chr01g0009771	HaOSCA3.1	0.552162
HannXRQ_Chr09g0256841	HaOSCA3.1	0.551977
HannXRQ_Chr06g0183991	HaOSCA3.1	0.551797
HannXRQ_Chr05g0129481	HaOSCA3.1	0.551731
HannXRQ_Chr17g0563151	HaOSCA3.1	0.551711
HannXRQ_Chr03g0089621	HaOSCA3.1	0.551216
HannXRQ_Chr16g0523561	HaOSCA3.1	0.55121
HannXRQ_Chr13g0399131	HaOSCA3.1	0.550928
HannXRQ_Chr11g0340291	HaOSCA3.1	0.550922
HannXRQ_Chr15g0489731	HaOSCA3.1	0.55035
HannXRQ_Chr08g0223221	HaOSCA3.1	0.549887
HannXRQ_Chr01g0029901	HaOSCA3.1	0.549871
HannXRQ_Chr06g0176281	HaOSCA3.1	0.549584
HannXRQ_Chr09g0276181	HaOSCA3.1	0.549514
HannXRQ_Chr17g0562251	HaOSCA3.1	0.549234
